# Supplementary material
Source: PubMed Central journal article supplement (PMC4896751)
Supplement: NIHMS720468-supplement-01.pdf [file NIHMS720468-supplement-01.pdf]

**Supplemental Table 1.** Mean age and percent of cycles as a function of the number of oocytes retrieved at each diagnosis. The row for each diagnosis totals 100%. N=number of cycles.

|                            |         | Number of Oocytes Retrieved |          |          |          |          |          |          |
|----------------------------|---------|-----------------------------|----------|----------|----------|----------|----------|----------|
|                            |         | N                           | 1-5      | 6-10     | 11-15    | 16-20    | 21-25    | >25      |
| Female age                 |         |                             | 38.0±4.3 | 36.3±4.5 | 35.1±4.5 | 34.4±4.5 | 33.9±4.4 | 33.4±4.4 |
| (mean years±SD)            |         |                             |          |          |          |          |          |          |
| Diagnosis                  |         |                             |          |          |          |          |          |          |
| Male                       | 252,578 | 13.9                        | 28.9     | 25.7     | 16.1     | 8.5      | 7.0      |          |
| Endometriosis              | 77,886  | 17.6                        | 31.8     | 24.8     | 14.0     | 6.8      | 5.1      |          |
| Ovulation Disorders        | 96,107  | 8.7                         | 22.0     | 24.7     | 19.5     | 11.9     | 13.1     |          |
| Diminished Ovarian Reserve | 128,849 | 34.5                        | 36.4     | 17.3     | 7.1      | 2.8      | 1.8      |          |
| All tubal                  | 112,517 | 17.7                        | 17.4     | 17.1     | 16.7     | 16.5     | 15.4     |          |
| Uterine                    | 31,130  | 19.2                        | 31.2     | 23.9     | 13.5     | 6.7      | 5.6      |          |
| Other                      | 88,661  | 13.3                        | 13.4     | 13.3     | 13.5     | 13.4     | 14.5     |          |
| Unexplained                | 89,582  | 12.7                        | 30.4     | 26.9     | 16.3     | 7.9      | 5.9      |          |

**Supplemental Table 2.** Live birth rate per cycle as a function of gonadotropin dose and number of oocytes retrieved for the agonist suppression (long) protocol which represented 48.9% of all cycles in the dataset. The symbol --- indicates that the total cell count was <100.

| FSH Dose (IU)         | Number of Oocytes Retrieved |      |      |       |       |       |      |
|-----------------------|-----------------------------|------|------|-------|-------|-------|------|
|                       | All                         | 1-5  | 6-10 | 11-15 | 16-20 | 21-25 | >25  |
| <hr/> All ages        |                             |      |      |       |       |       |      |
| <1000                 | 47.0                        | 25.7 | 47.1 | 48.5  | 51.5  | 48.1  | 44.4 |
| 1000-2000             | 46.4                        | 30.2 | 43.2 | 47.7  | 49.4  | 48.9  | 45.7 |
| 2001-3000             | 42.1                        | 26.2 | 39.3 | 44.3  | 46.0  | 45.2  | 43.0 |
| 3001-4000             | 35.8                        | 21.8 | 34.4 | 39.3  | 40.4  | 40.3  | 37.6 |
| 4001-5000             | 30.3                        | 18.2 | 30.2 | 34.1  | 36.3  | 35.4  | 36.3 |
| ≥5001                 | 22.4                        | 13.8 | 23.8 | 28.6  | 28.6  | 28.7  | 31.9 |
| <hr/> Age ≤34 years   |                             |      |      |       |       |       |      |
| <1000                 | 49.4                        | 29.6 | 50.2 | 51.0  | 53.1  | 50.0  | 45.4 |
| 1000-2000             | 48.8                        | 34.4 | 45.8 | 50.6  | 51.3  | 51.5  | 46.8 |
| 2001-3000             | 46.3                        | 33.0 | 43.6 | 48.4  | 49.3  | 47.9  | 45.6 |
| 3001-4000             | 42.4                        | 29.9 | 41.7 | 45.3  | 44.2  | 44.6  | 41.3 |
| 4001-5000             | 38.2                        | 26.1 | 37.6 | 41.3  | 41.7  | 43.4  | 42.2 |
| ≥5001                 | 31.6                        | 24.3 | 33.0 | 35.0  | 34.4  | 30.0  | 37.7 |
| <hr/> Age 35-39 years |                             |      |      |       |       |       |      |
| <1000                 | 42.2                        | ---  | 41.4 | 41.9  | 46.6  | 43.5  | 45.7 |
| 1000-2000             | 42.0                        | 25.5 | 39.4 | 42.1  | 46.3  | 43.1  | 43.7 |
| 2001-3000             | 38.9                        | 23.8 | 36.9 | 40.6  | 43.2  | 42.7  | 40.2 |
| 3001-4000             | 34.2                        | 22.1 | 33.0 | 37.1  | 39.4  | 37.7  | 37.0 |
| 4001-5000             | 31.3                        | 20.4 | 31.8 | 34.8  | 36.7  | 32.2  | 35.6 |

|       |      |      |      |      |      |      |      |
|-------|------|------|------|------|------|------|------|
| ≥5001 | 24.8 | 16.1 | 26.5 | 30.8 | 29.9 | 32.7 | 33.5 |
|-------|------|------|------|------|------|------|------|

---

Age ≥40 years

|           |      |      |      |      |      |      |      |
|-----------|------|------|------|------|------|------|------|
| <1000     | 17.0 | ---  | ---  | ---  | ---  | ---  | ---  |
| 1000-2000 | 25.9 | 11.4 | 23.2 | 27.1 | 27.3 | 31.0 | 32.7 |
| 2001-3000 | 23.2 | 10.2 | 21.3 | 25.7 | 26.8 | 29.1 | 30.6 |
| 3001-4000 | 19.4 | 9.1  | 17.9 | 23.2 | 26.6 | 28.5 | 23.3 |
| 4001-5000 | 16.0 | 8.8  | 16.3 | 18.7 | 23.1 | 22.9 | 23.1 |
| ≥5001     | 11.3 | 6.1  | 12.5 | 17.4 | 17.4 | 18.5 | ---  |

**Supplemental Table 3.** Live birth rate per cycle as a function of gonadotropin dose and number of oocytes retrieved for the agonist flare protocol which represented 12.4% of all cycles in the dataset. The symbol --- indicates that the total cell count was <100.

| FSH Dose (IU)   | Number of Oocytes Retrieved |      |      |       |       |       |      |
|-----------------|-----------------------------|------|------|-------|-------|-------|------|
|                 | All                         | 1-5  | 6-10 | 11-15 | 16-20 | 21-25 | >25  |
| <hr/>           |                             |      |      |       |       |       |      |
| All ages        |                             |      |      |       |       |       |      |
| <1000           | 33.8                        | 30.3 | 25.0 | 43.6  | ---   | ---   | ---  |
| 1000-2000       | 33.0                        | 20.6 | 30.9 | 35.3  | 40.1  | 37.4  | 38.0 |
| 2001-3000       | 29.4                        | 17.2 | 29.2 | 33.0  | 36.5  | 36.9  | 36.4 |
| 3001-4000       | 26.5                        | 16.9 | 26.8 | 32.2  | 32.0  | 35.7  | 35.6 |
| 4001-5000       | 24.2                        | 15.4 | 25.6 | 30.6  | 31.9  | 28.4  | 27.5 |
| ≥5001           | 18.8                        | 11.7 | 21.6 | 26.0  | 26.1  | 25.1  | 27.5 |
| <hr/>           |                             |      |      |       |       |       |      |
| Age ≤34 years   |                             |      |      |       |       |       |      |
| <1000           | 40.8                        | ---  | ---  | ---   | ---   | ---   | ---  |
| 1000-2000       | 40.4                        | 28.7 | 39.5 | 43.1  | 46.4  | 36.9  | 40.9 |
| 2001-3000       | 38.5                        | 30.9 | 37.8 | 40.1  | 41.3  | 41.8  | 38.7 |
| 3001-4000       | 37.4                        | 28.2 | 36.6 | 42.3  | 41.5  | 41.1  | 42.7 |
| 4001-5000       | 34.1                        | 24.9 | 35.4 | 38.8  | 40.6  | 33.7  | 28.9 |
| ≥5001           | 30.2                        | 21.0 | 32.9 | 37.4  | 36.2  | 33.9  | ---  |
| <hr/>           |                             |      |      |       |       |       |      |
| Age 35-39 years |                             |      |      |       |       |       |      |
| <1000           | 33.9                        | ---  | ---  | ---   | ---   | ---   | ---  |
| 1000-2000       | 31.1                        | 21.2 | 29.4 | 31.6  | 35.7  | 43.8  | ---  |
| 2001-3000       | 31.2                        | 19.0 | 31.4 | 34.5  | 39.3  | 37.5  | 39.2 |
| 3001-4000       | 29.9                        | 20.7 | 30.8 | 34.5  | 34.4  | 39.4  | 35.1 |
| 4001-5000       | 28.0                        | 19.3 | 29.3 | 34.5  | 33.7  | 33.2  | 31.9 |

|       |      |      |      |      |      |      |     |
|-------|------|------|------|------|------|------|-----|
| ≥5001 | 22.4 | 15.7 | 24.8 | 28.5 | 28.0 | 26.5 | --- |
|-------|------|------|------|------|------|------|-----|

---

Age ≥40 years

|           |      |     |      |      |      |      |      |
|-----------|------|-----|------|------|------|------|------|
| <1000     | 11.7 | --- | ---  | ---  | ---  | ---  | ---  |
| 1000-2000 | 16.7 | 9.2 | 17.0 | 16.8 | 24.8 | ---  | ---  |
| 2001-3000 | 16.4 | 8.8 | 17.4 | 20.1 | 23.5 | 23.1 | ---  |
| 3001-4000 | 14.8 | 9.0 | 14.6 | 20.3 | 19.6 | 24.2 | 26.8 |
| 4001-5000 | 13.8 | 8.1 | 15.0 | 18.7 | 21.7 | 16.7 | 20.0 |
| ≥5001     | 10.6 | 5.6 | 13.2 | 16.5 | 16.7 | 16.4 | ---  |

**Supplemental Table 4.** Live birth rate per cycle as a function of gonadotropin dose and number of oocytes retrieved for the antagonist protocol which represented 37.1% of all cycles in the dataset. The symbol --- indicates that the total cell count was <100.

| FSH Dose (IU)         | Number of Oocytes Retrieved |      |      |       |       |       |      |
|-----------------------|-----------------------------|------|------|-------|-------|-------|------|
|                       | All                         | 1-5  | 6-10 | 11-15 | 16-20 | 21-25 | >25  |
| <hr/> All ages        |                             |      |      |       |       |       |      |
| <1000                 | 37.3                        | 16.6 | 38.0 | 43.8  | 47.6  | 47.0  | 37.4 |
| 1000-2000             | 40.0                        | 22.6 | 39.5 | 43.1  | 44.4  | 42.9  | 39.0 |
| 2001-3000             | 34.6                        | 20.2 | 33.4 | 37.7  | 39.3  | 38.8  | 35.0 |
| 3001-4000             | 28.7                        | 18.0 | 28.3 | 32.2  | 34.0  | 34.0  | 32.3 |
| 4001-5000             | 24.2                        | 15.1 | 25.3 | 28.2  | 29.2  | 29.6  | 26.5 |
| ≥5001                 | 18.9                        | 12.2 | 20.8 | 24.7  | 24.9  | 23.0  | 22.2 |
| <hr/> Age ≤34 years   |                             |      |      |       |       |       |      |
| <1000                 | 43.4                        | 35.8 | 41.7 | 45.2  | 47.5  | 50.5  | 37.2 |
| 1000-2000             | 44.7                        | 33.9 | 44.7 | 47.3  | 47.3  | 45.1  | 40.4 |
| 2001-3000             | 41.6                        | 29.1 | 40.8 | 44.8  | 43.8  | 43.5  | 37.5 |
| 3001-4000             | 37.6                        | 26.2 | 37.7 | 39.8  | 39.7  | 39.4  | 38.2 |
| 4001-5000             | 34.3                        | 25.9 | 37.0 | 36.1  | 36.1  | 34.6  | 28.2 |
| ≥5001                 | 28.6                        | 20.7 | 30.5 | 33.6  | 30.9  | 27.1  | 27.2 |
| <hr/> Age 35-39 years |                             |      |      |       |       |       |      |
| <1000                 | 35.0                        | 13.9 | 34.9 | 42.0  | 49.1  | ---   | ---  |
| 1000-2000             | 36.8                        | 22.8 | 37.3 | 39.3  | 41.5  | 38.9  | 35.7 |
| 2001-3000             | 33.4                        | 22.7 | 33.8 | 35.2  | 37.4  | 35.5  | 33.8 |
| 3001-4000             | 30.7                        | 22.5 | 31.0 | 32.9  | 34.9  | 34.8  | 30.8 |
| 4001-5000             | 27.2                        | 19.1 | 28.2 | 30.4  | 31.2  | 30.9  | 30.1 |

|       |      |      |      |      |      |      |      |
|-------|------|------|------|------|------|------|------|
| ≥5001 | 22.9 | 16.5 | 24.7 | 27.6 | 28.4 | 24.0 | 23.6 |
|-------|------|------|------|------|------|------|------|

---

Age ≥40 years

|           |      |     |      |      |      |      |      |
|-----------|------|-----|------|------|------|------|------|
| <1000     | 13.1 | 3.8 | ---  | ---  | ---  | ---  | ---  |
| 1000-2000 | 17.4 | 7.7 | 17.3 | 22.8 | 23.7 | 28.0 | 27.6 |
| 2001-3000 | 17.4 | 9.2 | 16.9 | 19.6 | 24.6 | 23.7 | 22.9 |
| 3001-4000 | 14.9 | 9.2 | 14.7 | 18.4 | 20.1 | 19.7 | 18.6 |
| 4001-5000 | 13.5 | 7.6 | 14.3 | 17.7 | 18.1 | 20.1 | 17.3 |
| ≥5001     | 10.4 | 6.2 | 11.9 | 14.7 | 15.8 | 17.5 | 13.3 |

**Supplemental table 5.** Percentage of cycles as a function of the number of oocytes retrieved at each FSH dose with analysis limited to cycles with good prognosis (<35 years of age, BMI<30, no diagnosis of diminished ovarian reserve, endometriosis, or ovulatory disorder). Each row totals 100%. N=number of cycles.

| FSH dose (IU) | N      | Number of Oocytes Retrieved |      |       |       |       |      |
|---------------|--------|-----------------------------|------|-------|-------|-------|------|
|               |        | 1-5                         | 6-10 | 11-15 | 16-20 | 21-25 | >25  |
| <1000         | 3304   | 6.8                         | 21.6 | 27.8  | 21.7  | 12.0  | 10.0 |
| 1000-2000     | 41365  | 4.2                         | 19.2 | 27.6  | 22.8  | 13.8  | 12.3 |
| 2001-3000     | 44474  | 5.4                         | 23.8 | 29.8  | 21.1  | 11.1  | 8.9  |
| 3001-4000     | 18225  | 8.5                         | 29.6 | 29.9  | 17.7  | 8.2   | 6.1  |
| 4001-5000     | 10767  | 12.5                        | 33.8 | 29.2  | 14.2  | 6.5   | 3.8  |
| ≥5001         | 7149   | 20.4                        | 38.9 | 24.5  | 10.4  | 3.5   | 2.3  |
| Total         | 125284 | 7.0                         | 24.8 | 28.7  | 20.0  | 10.8  | 8.8  |
